# Supplementary material for: Recurrent Potential G-Quadruplex Sequences in Archaeal Genomes
Source: Front Microbiol. 2021 Mar 24;12:647851. doi: 10.3389/fmicb.2021.647851 (PMC8044849; doi:10.3389/fmicb.2021.647851)
Supplement: Supplementary file 5 [file Table_4.xlsx]

## Sheet: Table S4
	Quantity of rPQS close to gene
	Methanoculleus bourgensis MS2	Methanoculleus sp. MAB1	Methanoculleus chikugoensis isolate L21-II-0	Methanoculleus marisnigri JR1	Methanoculleus horonobensis strain JCM 15517	Methanoculleus sp. MH98A	Methanoculleus sediminis strain S3Fa	Methanoculleus thermophilus strain DSM 2373	Methanoculleus thermophilus strain CR-1	Methanolacinia petrolearia DSM 11571	Methanolacinia paynteri strain DSM 2545	Methanofollis sp. FWC-SCC2
['type III ribulose-bisphosphate carboxylase']	1	1		1	1	2	1	2	2
['DEAD/DEAH box helicase']	1	1		1	1		2			1	1
['peptidylprolyl isomerase']		1		1	1	1	1					1
['class I SAM-dependent methyltransferase']			1			1	1	1	1			1
['DUF5591 domain-containg protein']	2				2		1	3	3
['ferritin family protein']	2	1		2	1	1
['methenyltetrahydromethanopterin cyclohydrolase']	2	1		1	1	1
['NAD(P)/FAD-dependent oxidoreductase']			1	1	2			1	1
['sugar-specific transcriptional regulator TrmB']			1	2	1			1	1
['PAS domain S-box protein']	1	1	1	1			2
['radical SAM protein']	1		2	1		1					1
['excinuclease ABC subunit UvrB']				1	1		1	1				1
['formylmethanofuran--tetrahydromethanopterin N-formyltransferase']			1	1	1			1	1
['sigmaK-factor processing regulatory BofA']		1	1		1			1	1
['CBS domain-containing protein']	1	2	3		1
['FAD-dependent oxidoreductase']	3	2	1		1
['metal-dependent hydrolase']	3				1	1	1
['DUF2284 domain-containing protein']			1	2	1	1
['HlyC/CorC family transporter']		2			1	1	1
['peptidyl-tRNA hydrolase']			1		2			1	1
['TATA-box-binding protein']	1	2			1		1
['ornithine carbamoyltransferase']			1	1		1	2
['4-alpha-glucanotransferase']			1	2	1	1
['argininosuccinate lyase']				1		1		1	1
['coenzyme F420 hydrogenase subunit beta']	1	1						1	1
['dihydroxy-acid dehydratase']			1	1	1					1
['DNA polymerase IV']			1		1					1	1
['imidazole glycerol phosphate synthase subunit HisF']		1	1	1	1
['NAAT family transporter']	1	1			1		1
['nucleoside-diphosphate kinase']	1	1			1		1
['PspC domain-containing protein']				1	1		1	1
['ribosome biogenesis/translation initiation ATPase RLI']		1	1	1								1
['S-adenosylmethionine decarboxylase']	1	1						1	1
['TIGR00269 family protein']			1			1		1	1
['triose-phosphate isomerase']	1	1		1	1
['bifunctional ADP-dependent NAD(P)H-hydrate dehydratase/NAD(P)H-hydrate epimerase']				1	1			1	1
['DHH family phosphoesterase']				1	1			1	1
['YbjQ family protein']			1		1			1	1
['flavodoxin family protein']	2	3		1
['glycosyltransferase']	1			3	1
['4Fe-4S dicluster domain-containing protein']				2	1					2
['phosphomethylpyrimidine synthase ThiC']			3		1							1
['endonuclease III']				1	1		2
['UPF0179 family protein']	1	1			2
['F420-dependent methylenetetrahydromethanopterin dehydrogenase']		2						1	1
['threonine--tRNA ligase']				2	1	1
['type II toxin-antitoxin system HicA family toxin']	2	1								1
['NusA-like transcription termination signal-binding factor']	1	2				1
['ABC transporter substrate-binding protein']				1				1	1
['aminotransferase class V-fold PLP-dependent enzyme']				1		1		1
['AAA family ATPase']		1	1				1
['adenosylhomocysteinase']			1	1	1
['endonuclease']		1	1			1
['formate dehydrogenase accessory sulfurtransferase FdhD']				1		1		1
['glucose-6-phosphate isomerase']			1					1	1
['inorganic phosphate transporter']				1	1		1
['NAD(P)-binding domain-containing protein']	1		1			1
['sulfurtransferase']					1	1	1
['tRNA(Ile2) 2-agmatinylcytidine synthetase']			1					1	1
['uroporphyrinogen-III C-methyltransferase']			1	1	1
['DUF1922 domain-containing protein']	1		1		1
['IS5/IS1182 family transposase']	1	1									1
['PAS domain-containing protein']						1				1	1
['rubredoxin']	4	3
['glycine betaine ABC transporter substrate-binding protein']			1									3
['PH domain-containing protein']	2	2
['replication factor C large subunit']	2	2
['cation transporter']	2	2
['imidazoleglycerol-phosphate dehydratase HisB']	2	2
['methyltransferase domain-containing protein']				2	2
["pyridoxamine 5'-phosphate oxidase family protein"]	2	1
['deoxyhypusine synthase']			2		1
['GxxExxY protein']	2	1
['HEAT repeat domain-containing protein']	2	1
['alpha-glucan family phosphorylase']	2				1
['biotin transporter BioY']										2	1
['50S ribosomal protein P1']	1	2
['AMP-binding protein']				1	2
['helix-turn-helix domain-containing protein']		2									1
['phosphoesterase']		2	1
['GNAT family N-acetyltransferase']		2								1
['TIGR00303 family protein']				2	1
['cobalt ECF transporter T component CbiQ']			1		1
['Coenzyme F420 hydrogenase/dehydrogenase, beta subunit C-terminal domain']	1										1
['ADP-ribosylglycohydrolase family protein']	1	1
['4a-hydroxytetrahydrobiopterin dehydratase']	1	1
['cadmium-translocating P-type ATPase']	1	1
['aldehyde dehydrogenase family protein']								1	1
['ATPase']	1	1
['3-isopropylmalate dehydrogenase']	1	1
['aldolase']	1	1
['archaeosine biosynthesis radical SAM protein RaSEA']	1		1
['carbamoyl-phosphate synthase large subunit']			1		1
['carboxymuconolactone decarboxylase family protein']			1		1
['chloride channel protein']										1	1
['chorismate synthase']				1	1
['coenzyme-B sulfoethylthiotransferase subunit alpha']			1		1
['dihydroorotate dehydrogenase electron transfer subunit']	1	1
['DNA gyrase subunit A']			1			1
['DUF2281 domain-containing protein']	1	1
['DUF4013 domain-containing protein']	1	1
['ferredoxin:thioredoxin reductase']	1					1
['geranylgeranylglycerol-phosphate geranylgeranyltransferase']			1							1
['HesA/MoeB/ThiF family protein']	1	1
['hydroxylamine reductase']	1	1
['inositol-3-phosphate synthase']								1	1
['IS200/IS605 family element transposase accessory protein TnpB']			1			1
['isoleucine--tRNA ligase']			1							1
['molecular chaperone DnaJ']				1	1
['NADPH-dependent F420 reductase']	1	1
['NDP-sugar synthase']	1	1
['O-phospho-L-seryl-tRNA:Cys-tRNA synthase']		1		1
['peptide-methionine (S)-S-oxide reductase MsrA']			1	1
['phosphopantetheine adenylyltransferase']					1					1
['phosphoribosylformylglycinamidine cyclo-ligase']	1	1
['PQQ-binding-like beta-propeller repeat protein']	1	1
['right-handed parallel beta-helix repeat-containing protein']				1	1
['site-specific DNA-methyltransferase']	1	1
['SRPBCC family protein']	1	1
['tetratricopeptide repeat protein']	1	1
['thioredoxin']	1	1
['TIGR00725 family protein']			1							1
['TIGR04255 family protein']								1	1
['transglutaminase domain-containing protein']	1	1
['tRNA 4-thiouridine(8) synthase ThiI']		1		1
['type I 3-dehydroquinate dehydratase']				1	1
['YjbQ family protein']	1	1
['acetolactate decarboxylase']			1									1
['imidazole glycerol phosphate synthase subunit HisH']			1	1
['MBL fold metallo-hydrolase']		1										1
['mechanosensitive ion channel family protein']		1										1
['TIGR00300 family protein']	1	1
['TIGR03663 family protein']										1	1
['type II toxin-antitoxin system PemK/MazF family toxin']			1				1
['hydrogenase maturation protease']												3
['aminotransferase class I/II-fold pyridoxal phosphate-dependent enzyme']		3
['cobalamin B12-binding domain-containing protein']	3
['adenine deaminase']			2
['ATP-dependent DNA helicase RecQ']			2
['biotin--[acetyl-CoA-carboxylase] ligase']										2
['coenzyme F420-0:L-glutamate ligase']				2
['DUF1016 family protein']						2
['DUF1624 domain-containing protein']			2
['DUF357 domain-containing protein']		2
['flippase-like domain-containing protein']		2
['IS1634 family transposase']	2
['MATE family efflux transporter']				2
['NAD(P)-binding protein']		2
['N-formylglutamate amidohydrolase']			2
['nucleotidyltransferase family protein']	2
['peptidase M12']	2
['phosphoribosylanthranilate isomerase']		2
['pro-sigmaK processing inhibitor BofA family protein']	2
['Zn-dependent exopeptidase M28']	2
['arsenate reductase ArsC']			2
['histone']		2
['NFYB/HAP3 family transcription factor subunit']	2
['plasma-membrane proton-efflux P-type ATPase']	2
['RND family transporter']											2
['SDR family oxidoreductase']	2
['Tfx family DNA-binding protein']		2
['tyrosine-type recombinase/integrase']	2
['carboxylating nicotinate-nucleotide diphosphorylase']		1
['alanine dehydrogenase']				1
['30S ribosomal protein S3ae']	1
['50S ribosomal protein L40e']	1
['6-phosphofructokinase']				1
['ABC-ATPase domain-containing protein']										1
['ATP-dependent zinc protease']	1
['cell shape determination protein CcmA']			1
['acetate--CoA ligase']		1
['agmatinase']												1
['bifunctional nuclease family protein']		1
['CHAD domain-containing protein']												1
['2-isopropylmalate synthase']	1
['adenylosuccinate synthetase']		1
['class IV adenylate cyclase']										1
['cobyric acid synthase']			1
['(Fe-S)-cluster assembly protein']				1
['3,4-dihydroxy-2-butanone-4-phosphate synthase']		1
['30S ribosomal protein S24e']										1
['AarF/ABC1/UbiB kinase family protein']						1
['acetate--CoA ligase family protein']	1
['alpha/beta hydrolase']											1
['asparagine synthase (glutamine-hydrolyzing)']			1
['ATP-binding cassette domain-containing protein']										1
['ATP-dependent DNA helicase']	1
['bifunctional hydroxymethylpyrimidine kinase/phosphomethylpyrimidine kinase']											1
['calcium/sodium antiporter']			1
['cobalt-precorrin-7 (C(5))-methyltransferase']										1
['condensation protein']												1
['deoxyribonuclease V']	1
['dienelactone hydrolase family protein']			1
['dihydrofolate reductase family protein']	1
['DNA adenine methylase']	1
['DNA primase']											1
['DNA repair protein RadC']	1
['DUF1282 domain-containing protein']		1
['DUF1614 domain-containing protein']			1
['DUF169 domain-containing protein']			1
['DUF1743 domain-containing protein']					1
['DUF1917 domain-containing protein']	1
['DUF2178 domain-containing protein']			1
['DUF2795 domain-containing protein']	1
['DUF3006 domain-containing protein']		1
['DUF3006 family protein']	1
['DUF3656 domain-containing protein']	1
['DUF371 domain-containing protein']	1
['DUF4118 domain-containing protein']	1
['DUF4405 domain-containing protein']										1
['DUF45 domain-containing protein']		1
['DUF47 family protein']												1
['DUF4935 domain-containing protein']	1
['DUF5611 family protein']	1
['DUF86 domain-containing protein']												1
['exodeoxyribonuclease VII small subunit']	1
['fasciclin']			1
['fibronectin-binding domain-containing protein']				1
['flavodoxin domain-containing protein']	1
['formate dehydrogenase subunit alpha']	1
['formate dehydrogenase subunit beta']										1
['fructose-1,6-bisphosphatase']										1
['gamma carbonic anhydrase family protein']					1
['Gfo/Idh/MocA family oxidoreductase']			1
['GHMP kinase']						1
['glucosidase']	1
['glycosyltransferase family 1 protein']			1
['glyoxalase']												1
['GTP-dependent dephospho-CoA kinase family protein']										1
['histone deacetylase']			1
['hotdog fold thioesterase']				1
['HypC/HybG/HupF family hydrogenase formation chaperone']						1
['isocitrate/isopropylmalate dehydrogenase family protein']					1
['JAB domain-containing protein']		1
['leucine--tRNA ligase']	1
['M48 family metallopeptidase']	1
['META domain-containing protein']			1
['metallophosphoesterase']										1
['methionine synthase']	1
['MFS transporter']										1
['MogA/MoaB family molybdenum cofactor biosynthesis protein']												1
['nuclear transport factor 2 family protein']			1
['nucleoside deaminase']		1
['oxidoreductase']					1
['PaaI family thioesterase']			1
['PEGA domain-containing protein']		1
['phosphoenolpyruvate carboxylase']	1
['phosphoenolpyruvate synthase']	1
['phosphoribosyl-ATP diphosphatase']		1
['P-II family nitrogen regulator']			1
['PKD domain-containing protein']										1
['potassium channel family protein']												1
['prefoldin subunit beta']	1
['protease inhibitor I42 family protein']	1
['pseudouridine synthase']			1
['QacE family quaternary ammonium compound efflux SMR transporter']											1
['recombinase family protein']	1
['redox protein']										1
['response regulator']	1
['SIMPL domain-containing protein']												1
['sodium-translocating pyrophosphatase']												1
['thioredoxin family protein']										1
['TIGR03557 family F420-dependent LLM class oxidoreductase']			1
['TOBE domain-containing protein']	1
['transporter']		1
['tRNA pseudouridine(13) synthase TruD']	1
['type II secretion system F family protein']			1
['type II toxin-antitoxin system HicB family antitoxin']										1
['ubiquinone biosynthesis protein']	1
['universal stress protein']			1
['UvrD-helicase domain-containing protein']	1
['V-type ATP synthase subunit D']			1
['YbhB/YbcL family Raf kinase inhibitor-like protein']		1
['YcaO-related McrA-glycine thioamidation protein']			1
['YggU family protein']											1
['YIP1 family protein']	1
['hypothetical protein']	31	29	11	18	5	13	3	6	6	9	6	10
NONE			10		3	5	3	2	2		3	1
